# Supplementary material
Source: publisher figshare collection journal article supplement (https://acs.figshare.com/ndownloader/files/3858100)
Supplement: Supplementary file 1 [file 3858100]

# Supporting Information

## Mimicry of Sputtered *i*-ZnO Thin Films Using Chemical Bath Deposition for Solution-Processed Solar Cells

*Enrico Della Gaspera,<sup>\*,†</sup> Joel van Embden,<sup>†</sup> Anthony S. R. Chesman,<sup>†</sup> Noel W. Duffy,<sup>†</sup> Jacek J.  
Jasieniak<sup>\*,†</sup>*

<sup>†</sup> CSIRO Manufacturing Flagship, Bayview Avenue, Clayton, Victoria 3168, Australia

Corresponding Authors:

enrico.dellagaspera@csiro.au (E.D.G.)

jacek.jasieniak@csiro.au (J.J.J.)

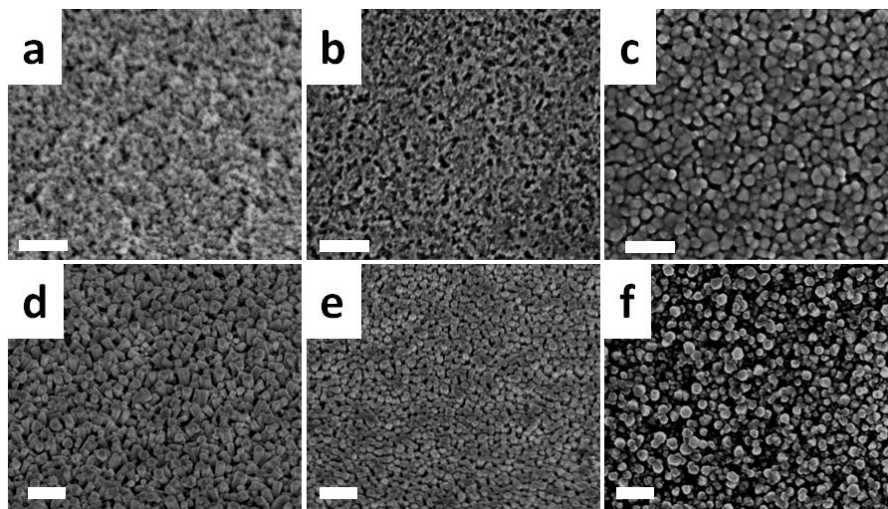

**Figure S1.** (a-c) SEM micrographs of ZnO seeds: NPs annealed at 180 °C (a), sol-gel annealed at 180 °C (b), sol-gel annealed at 400 °C (c). (d-f) SEM micrographs of ZnO deposited from chemical bath using different seeds: NPs (d), sol-gel annealed at 180 °C (e) and sol-gel annealed at 400 °C (f). Scale bars are 100 nm for panels a-c and 200 nm for panels d-f.

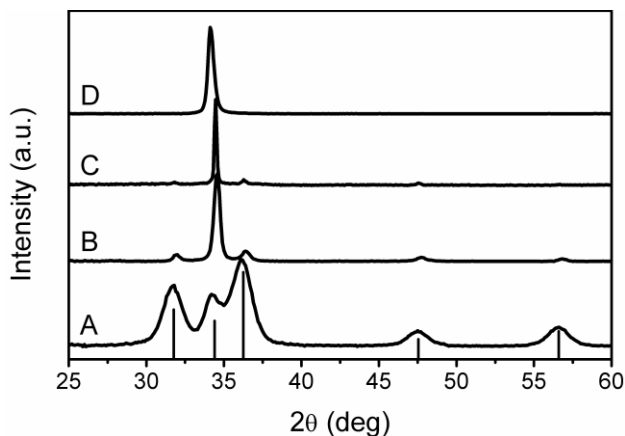

**Figure S2.** XRD patterns of different ZnO films: (A) deposited from a NPs solution and annealed at 180 °C; (B) deposited from sol-gel and annealed at 400 °C; (C) deposited from chemical bath at 70 °C; (D) sputtered. The reference pattern for wurtzite ZnO is shown at the bottom. The average crystallite size evaluated with the Scherrer formula is about 6 nm, 19 nm, 53 nm and 21 nm for patterns A, B, C and D, respectively.

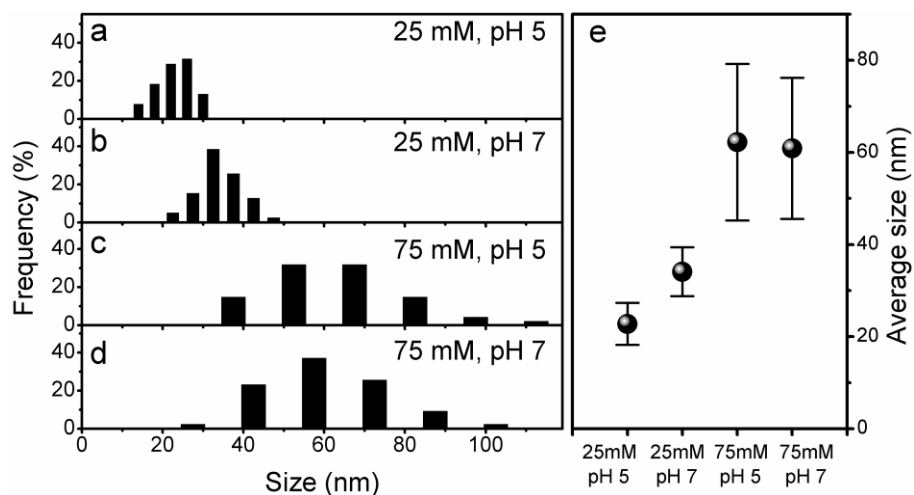

**Figure S3.** (a-d) Distribution of the lateral size of ZnO grains evaluated from the top view images of Figure 2a. (e) Plot of the average size of the top surfaces of ZnO crystals as a function of the bath conditions. The errors are plus or minus one standard deviation.

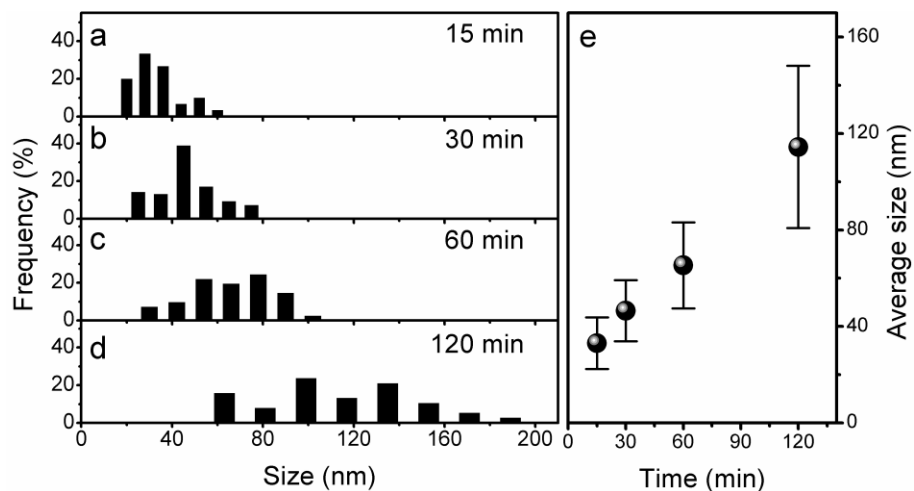

**Figure S4.** (a-d) Distribution of the lateral size of ZnO grains evaluated from the top view images of Figure 2c. (e) Plot of the average size of the top surfaces of ZnO crystals as a function of the deposition time. The errors are plus or minus one standard deviation.

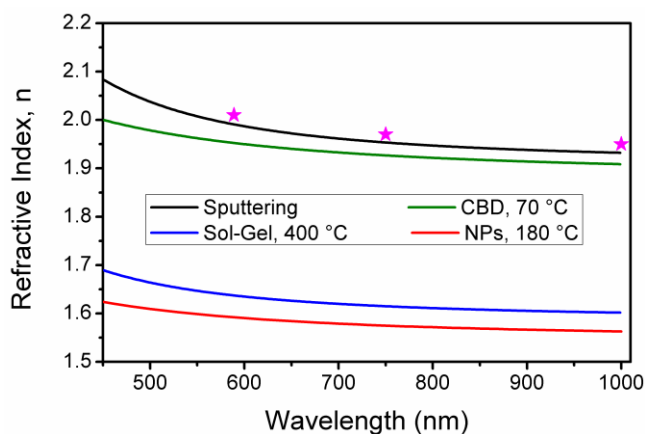

**Figure S5.** Refractive index dispersion curves for different types of ZnO thin films. The values at three wavelengths for fully dense, bulk ZnO are reported as pink stars.<sup>1</sup>

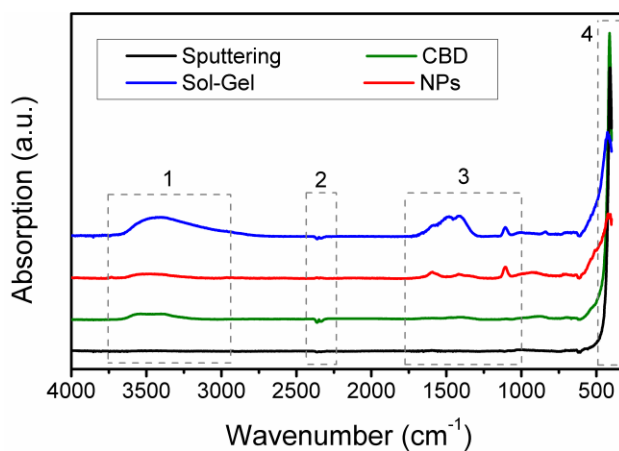

**Figure S6.** FTIR spectra of different ZnO films. The sputtered film does not show any vibrational peaks beside the one related to ZnO (box 4), while the sol-gel film shows prominent –OH (box 1) and organic (box 3) vibrations. ZnO film from NPs also presents peaks related to organic and hydroxyl groups, even if much weaker compared to the sol-gel film, while the sample prepared from CBD shows a very intense ZnO peak and only a minor contribution from –OH vibrations. The peaks highlighted in box 2 are due to CO<sub>2</sub>.

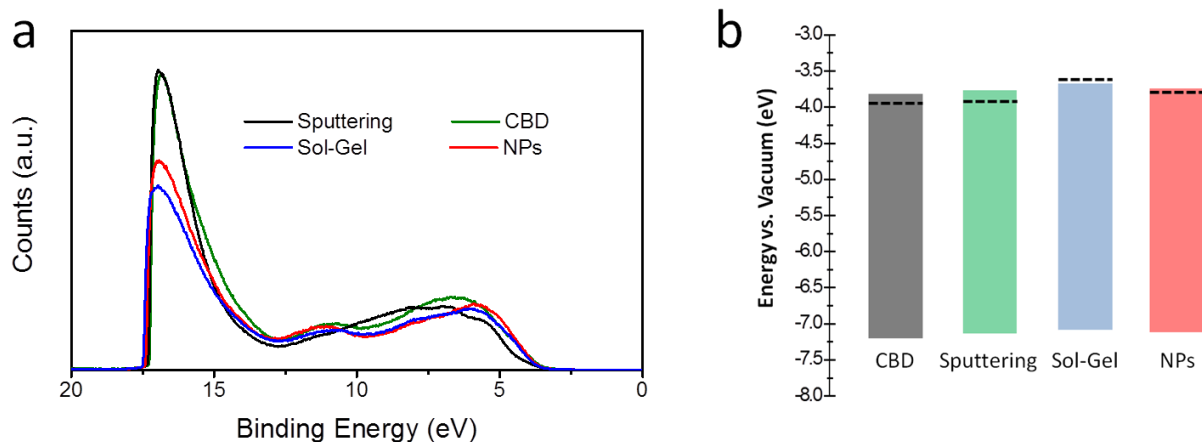

**Figure S7.** (a) UPS spectra of different ZnO films. (b) Schematic diagram of the flat-band energies derived from UPS data for different ZnO films. The Fermi energies are included as dashed lines. For the actual values, refer to Table S5.

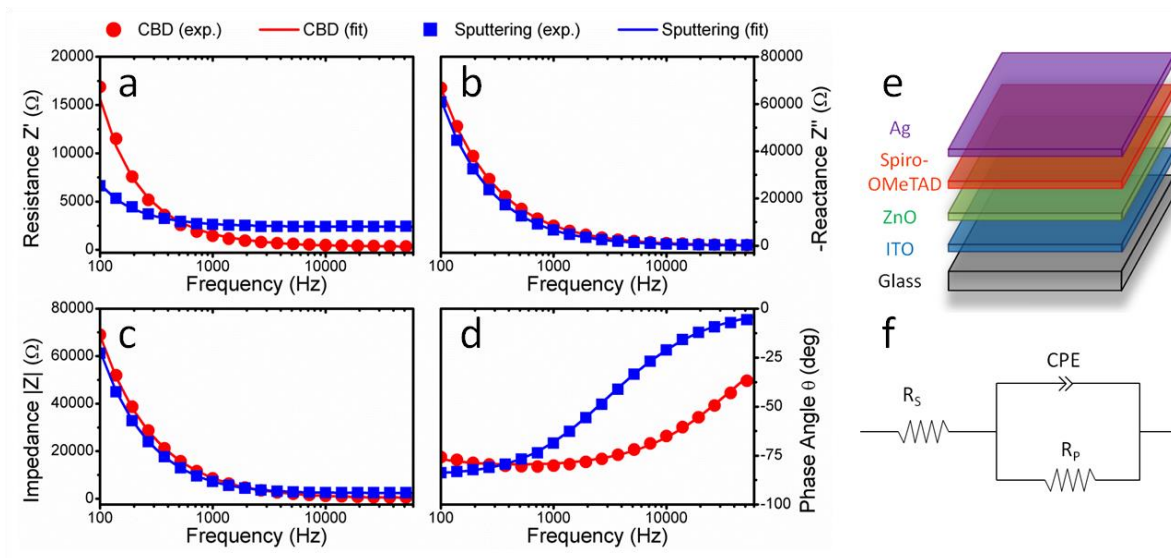

**Figure S8.** (a) Resistance, (b) reactance, (c) impedance and (d) phase angle plots as a function of frequency for ZnO films prepared via CBD (red dots) and sputtering (blue squares) measured using impedance spectroscopy. The continuous lines are the fits of the experimental data. (e) Schematic representation of the diode architecture. (f) Equivalent circuit diagram used to model the experimental data, where  $R_s$  is the series resistance,  $R_p$  is the parallel resistance and CPE is the constant phase element (see Table S6 for the modeling results).

**Table S1.** Optimized conditions for the CBD of thin and dense ZnO films.

| Parameter                    | Investigated conditions                      | Optimized conditions                                | Comments                                                           |
|------------------------------|----------------------------------------------|-----------------------------------------------------|--------------------------------------------------------------------|
| Seed layer                   | NPs, sol-gel. Annealed up to 400 °C          | Sol-gel, annealed at 180 °C                         | /                                                                  |
| Zinc nitrate concentration   | 25-75 mM                                     | 75 mM                                               | Concentration in the final bath.                                   |
| HMTA concentration           | 25-75 mM                                     | 75 mM                                               | Concentration in the final bath.                                   |
| pH of starting zinc solution | 4-7                                          | 7                                                   | Adjusted with aqueous NH <sub>3</sub> solution.                    |
| Bath temperature             | 60-90 °C                                     | 70 °C                                               | /                                                                  |
| Reaction time                | Up to 4 hours                                | 30-60 min                                           | Thickness between 100 and 150 nm.                                  |
| Sample position              | Standing vertical, or inclined $\pm 30$ deg. | Seeded surface facing down, inclined $\sim 10$ deg. | Facing down to avoid precipitates settling on the growing surface. |

**Table S2.** Thickness (t) and average surface roughness ( $R_a$ ) of the ZnO samples prepared via CBD (refer to Figure 2c for SEM characterization) and sputtering (refer to Figure 3 for SEM characterization) as measured with profilometry.

| Sample      | t (nm) | $R_a$ (nm)    |
|-------------|--------|---------------|
| CBD 15 min  | 65     | 1.6 $\pm$ 1.1 |
| CBD 30 min  | 100    | 1.4 $\pm$ 0.3 |
| CBD 60 min  | 140    | 2.6 $\pm$ 1.3 |
| CBD 120 min | 295    | 4.9 $\pm$ 3.7 |
| Sputtering  | 150    | 2.1 $\pm$ 1.8 |

**Table S3.** Relative intensities of five different diffraction peaks, texture coefficient  $P$  along the (002) direction and alignment factor  $A$  for different ZnO films evaluated from the XRD patterns of Figure S2.

|                         | $I_{(100)}$ | $I_{(002)}$ | $I_{(101)}$ | $I_{(102)}$ | $I_{(110)}$ | $P_{(002)}$ | $A$ (%) |
|-------------------------|-------------|-------------|-------------|-------------|-------------|-------------|---------|
| Ref. (ICDD No. 36-1451) | 57          | 44          | 100         | 23          | 32          | 1           | 0       |
| Sputtered               | 0           | 100         | 0           | 0           | 0           | 5           | 100     |
| CBD                     | 2           | 100         | 4.5         | 2.3         | 0.8         | 4.60        | 90      |
| Sol-Gel at 400 °C       | 7.9         | 100         | 12          | 4.6         | 3.2         | 4.01        | 75      |
| NPs at 180 °C           | 70          | 59          | 100         | 19          | 22          | 1.29        | 7       |

The texture coefficient  $P$  of the  $(hkl)$  diffraction is calculated according to the formula:

$$P(h_i k_i l_i) = \frac{I(h_i k_i l_i)}{I_0(h_i k_i l_i)} \left[ \frac{1}{n} \sum_{i=1}^n \frac{I(h_i k_i l_i)}{I_0(h_i k_i l_i)} \right]^{-1}$$

Where  $I_0$  is the standard intensity,  $I$  is the experimental intensity of the  $(h_i k_i l_i)$  diffraction and  $n$  is the number of peaks taken into consideration.<sup>2</sup> The texture coefficient ranges between 1 (no alignment) and  $n$  (perfect alignment).

We defined the alignment factor  $A$  as the following:

$$A(\%) = \frac{P - 1}{n - 1} \times 100$$

The alignment factor ranges from 0% (no alignment) to 100% (complete alignment).

**Table S4.** Refractive index values at three different wavelengths for the thin films presented in Figure S6, and relative pores volume fraction evaluated with the Bruggeman relationship.<sup>3</sup>

| Sample                   | n <sub>(589 nm)</sub> | Porosity (%) | n <sub>(750 nm)</sub> | Porosity (%) | n <sub>(1000 nm)</sub> | Porosity (%) |
|--------------------------|-----------------------|--------------|-----------------------|--------------|------------------------|--------------|
| Reference <sup>[3]</sup> | 2.01                  | /            | 1.97                  | /            | 1.95                   | /            |
| CBD                      | 1.95                  | 6            | 1.93                  | 4            | 1.91                   | 4            |
| Sputtering               | 1.99                  | 2            | 1.95                  | 2            | 1.93                   | 2            |
| Sol-Gel                  | 1.64                  | 35           | 1.62                  | 34           | 1.60                   | 35           |
| NPs                      | 1.59                  | 40           | 1.57                  | 39           | 1.56                   | 39           |

**Table S5.** Valence band ( $E_{VB}$ ), conduction band ( $E_{CB}$ ) and Fermi energy ( $E_f$ ) values for different ZnO films as obtained from UPS. The values for the optical and electrical band gap ( $E_{g,op}$  and  $E_{g,el}$  respectively) are included as well. The electrical band gap is calculated as the sum of the optical bandgap, derived from optical absorption measurements, and the bulk exciton binding energy (60 meV for ZnO).

| Sample     | $E_{VB}$ vs.<br>vacuum (eV) | $E_f$ vs.<br>vacuum (eV) | $E_{g,op}$ (eV) | $E_{g,el}$ (eV) | $E_{CB}$ vs.<br>vacuum (eV) |
|------------|-----------------------------|--------------------------|-----------------|-----------------|-----------------------------|
| CBD        | -7.22                       | -3.95                    | 3.3             | 3.36            | -3.86                       |
| Sputtering | -7.16                       | -3.92                    | 3.3             | 3.36            | -3.8                        |
| Sol-Gel    | -7.1                        | -3.62                    | 3.37            | 3.43            | -3.67                       |
| NPs        | -7.14                       | -3.8                     | 3.38            | 3.44            | -3.76                       |



**Table S6.** Coefficient of determination of the fitting ( $R^2$ ), series resistance ( $R_S$ ), parallel resistance ( $R_P$ ), parallel capacitance ( $C_P$ ) and exponent of the CPE element ( $\alpha$ ) for diodes prepared using sputtered and CBD-grown ZnO films as evaluated from impedance spectroscopy measurements. The device prepared without ZnO showed a purely resistive behavior with a resistance of  $\sim 30 \Omega$ .

| Sample     | $R^2$ | $R_S (\Omega)$ | $R_P (\Omega)$     | $C_P (F)$             | $\alpha$ |
|------------|-------|----------------|--------------------|-----------------------|----------|
| CBD        | 0.945 | 321            | $8.52 \times 10^5$ | $4.15 \times 10^{-8}$ | 0.91     |
| Sputtering | 0.974 | 2395           | $1.98 \times 10^6$ | $3.02 \times 10^{-8}$ | 0.97     |

## References

- (1) Lide, D. R. *CRC Handbook of Chemistry and Physics*, 87th ed; Taylor and Francis: Boca Raton, FL, USA, 2007, 10-248.
- (2) Barret, C.; Massalski, T. B. *Structure of Metals*; Pergamon Press: Oxford, UK 1980, 1923.
- (3) Bruggeman, D. A. G. Berechnung Verschiedener Physikalischer Konstanten von Heterogenen Substanzen. *Ann. Phys. (Leipzig, Germany)* **1935**, 24, 636-679.
